# Supplementary material for: Amphiphobic triboelectric nanogenerators based on silica enhanced thermoplastic polymeric nanofiber membranes
Source: Royal Society of Chemistry journal article supplement (doi:10.1039/c9nr09925e), 2020-01-01
Supplement: c9nr09925e1.pdf [file c9nr09925e1.pdf]

## Supporting Information

### **Amphiphobic triboelectric nanogenerators based on silica enhanced thermoplastic polymeric nanofiber membranes**

Shan Yan, Keyi Dong, Jianwei Lu, Wei Song, Ru Xiao\*

State Key Laboratory for Modification of Chemical Fibers and Polymer Materials,  
College of Materials Science and Engineering, Donghua University, Shanghai 201620,  
PR China

\*Corresponding author: R. Xiao, email: [xiaoru@dhu.edu.cn](mailto:xiaoru@dhu.edu.cn)

**Keywords:** Triboelectric nanogenerators; Thermoplastic polymeric nanofiber membranes; Silica; Fluorine-containing polymer; Amphiphobicity

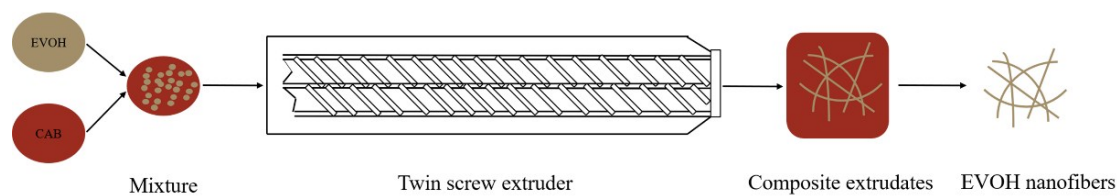

**Figure S1.** Schematic diagram of the melt-blending extrusion for the preparation of EVOH nanofibers.

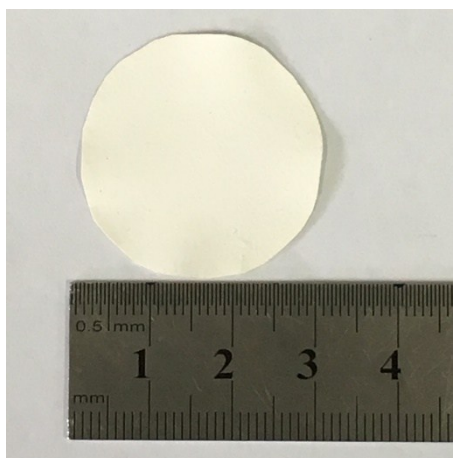

**Figure S2.** The size of as-prepared PTFE/PVDF/EVOH composite nanofiber membranes.

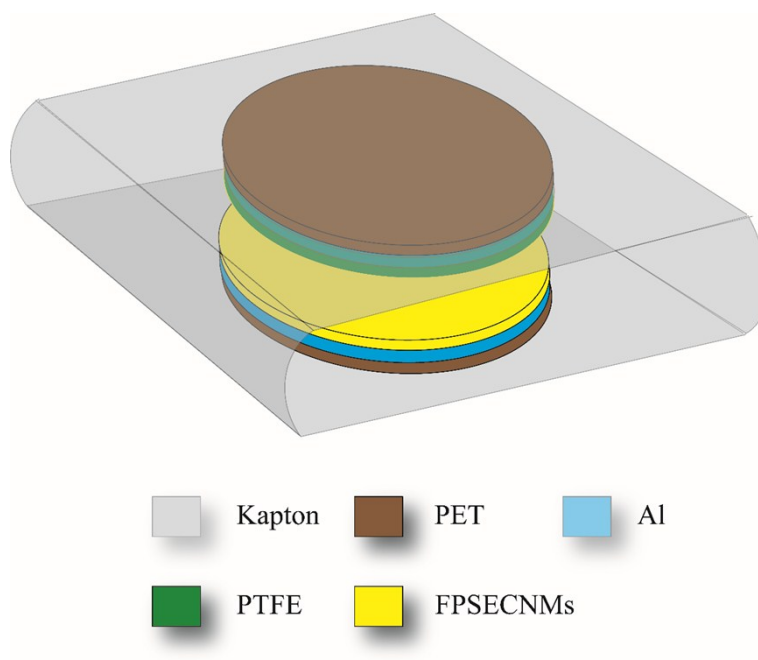

**Figure S3.** The prototype structure of as-fabricated FPSECNM-TENG device.

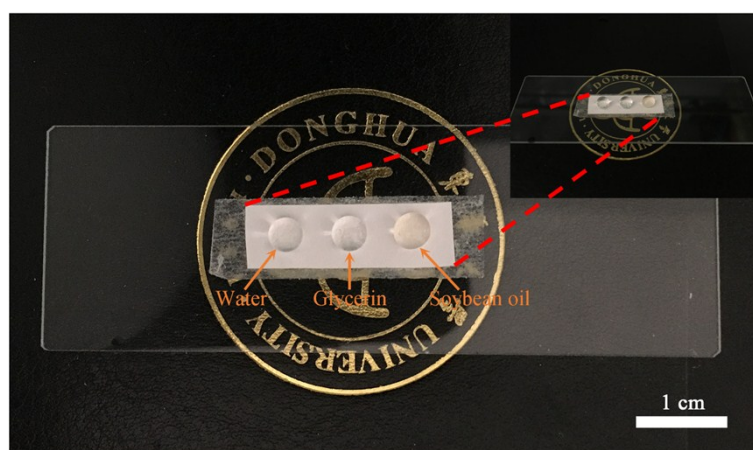

**Figure S4.** A snapshot of water, glycerin and soybean oil on the surface of FPSECNMs showing excellent amphiphobicity.

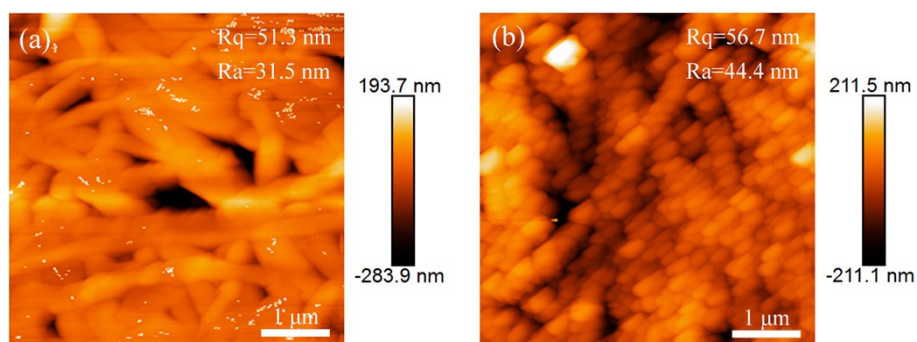

**Figure S5.** The AFM images of (a) EVOH and (b)  $\text{SiO}_2/\text{EVOH}$  composite nanofiber membranes with measured surface roughness.

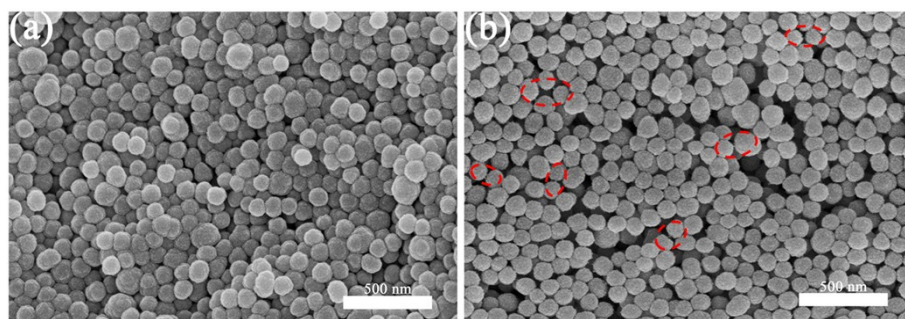

**Figure S6.** The FE-SEM images of prepared  $\text{SiO}_2$  nanoparticles (a) before and (b) after introducing FAS.

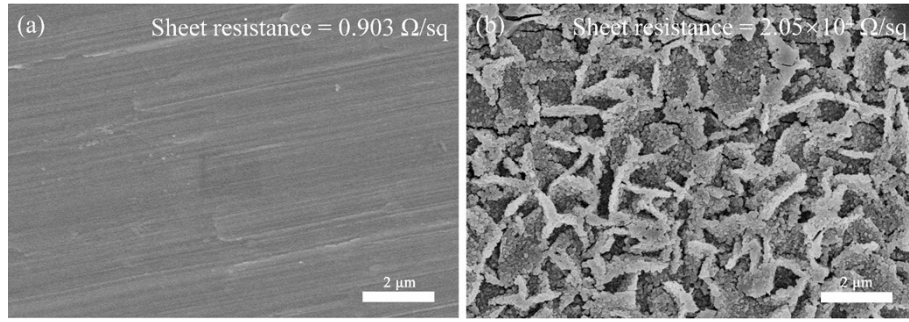

**Figure S7.** The FE-SEM image of Al foil (a) before and (b) after etched by 1M EVOH for 1 min (insert is the respective sheet resistance value analyzed by a four-point probe measurement (Loresta-GX MCP-T700, Mitsubishi Chemical Analytech Co., Ltd, Japan)).

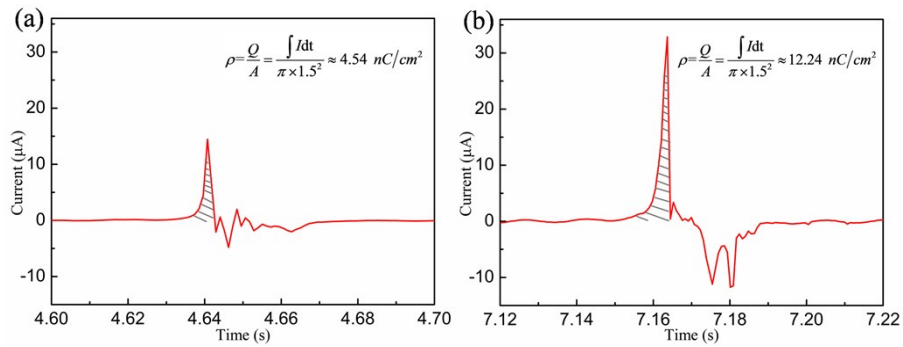

**Figure S8.** The respective calculated surface triboelectric charge density generated by (a) a bare EVOH, (b) SiO<sub>2</sub>/EVOH composite nanofiber membranes and a PTFE film as the triboelectric pair.

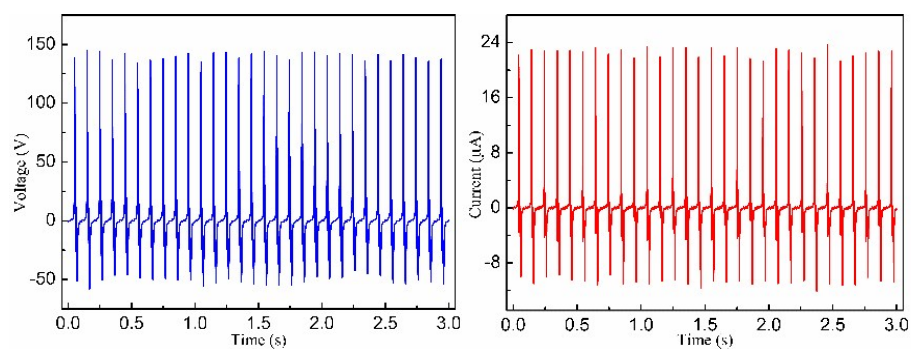

**Figure S9.** The output (left) open-circuit voltage and (right) short-circuit current generated by FPSECNMs and PTFE film as the triboelectric pair.

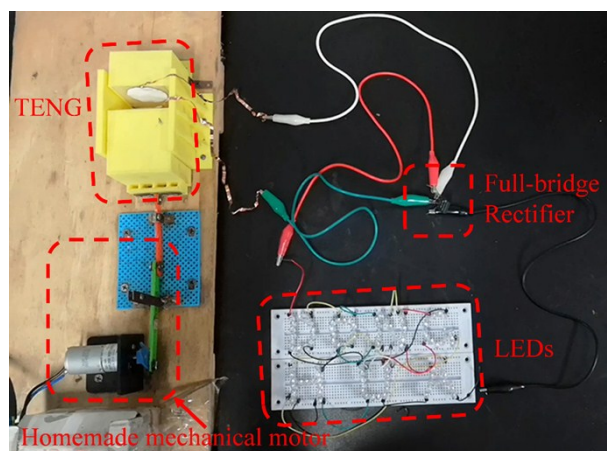

**Figure S10.** A photograph of power-supplying diagram of charging green LEDs by FPSECNM-TENGs with a rectifier circuit.

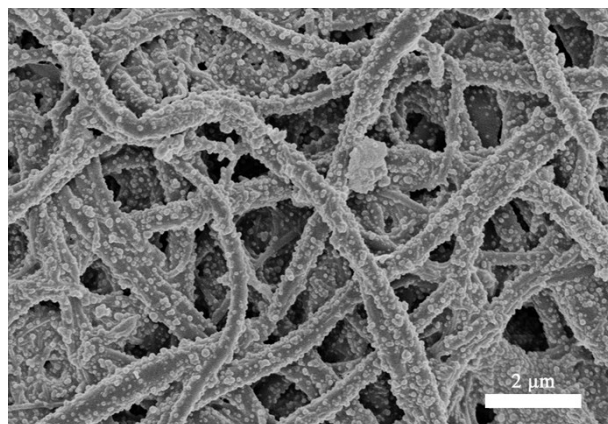

**Figure S11.** A FE-SEM image of FAS/PVDF-HFP/SiO<sub>2</sub>/EVOH composite nanofiber membranes after more than 10000 contact-separation cycles.

**Video S1.** Self-cleaning effect of FPSECNMs for clay particles.

**Video S2.** 100 green LEDs composed of the letters “DONGHUA” could be lighted up sustainably by the fabricated TENG which contains FPSECNMs and a commercial PTFE film as a triboelectric pair after measuring continuous contact-separation operations for more than 10000 cycles.
